# Supplementary material
Source: Springer Nature journal article supplement (https://www.springermedizin.de/resource/supplementary/13256_2010_1690_MOESM2_ESM.pdf/9648228)

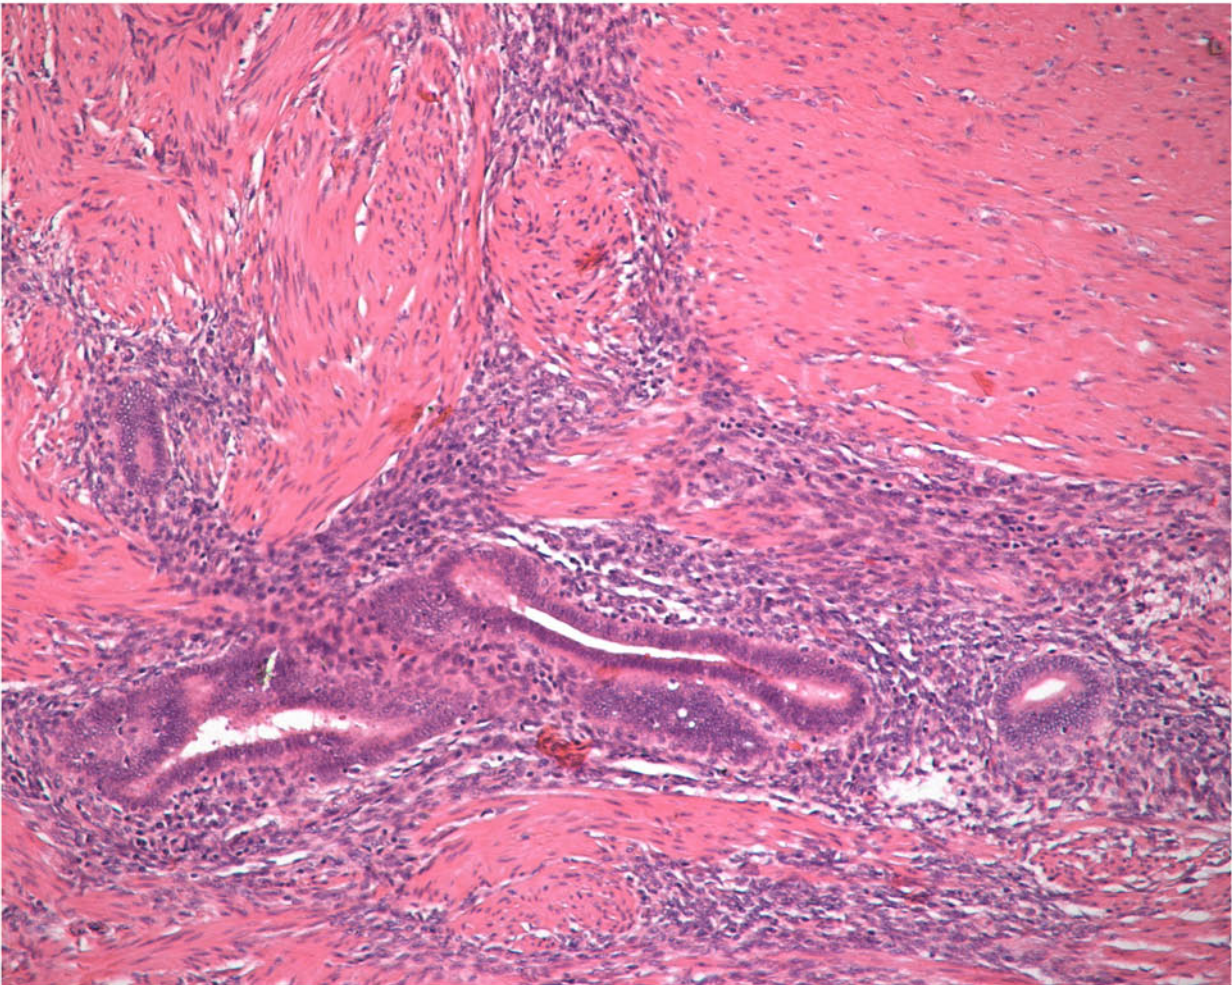

(a)

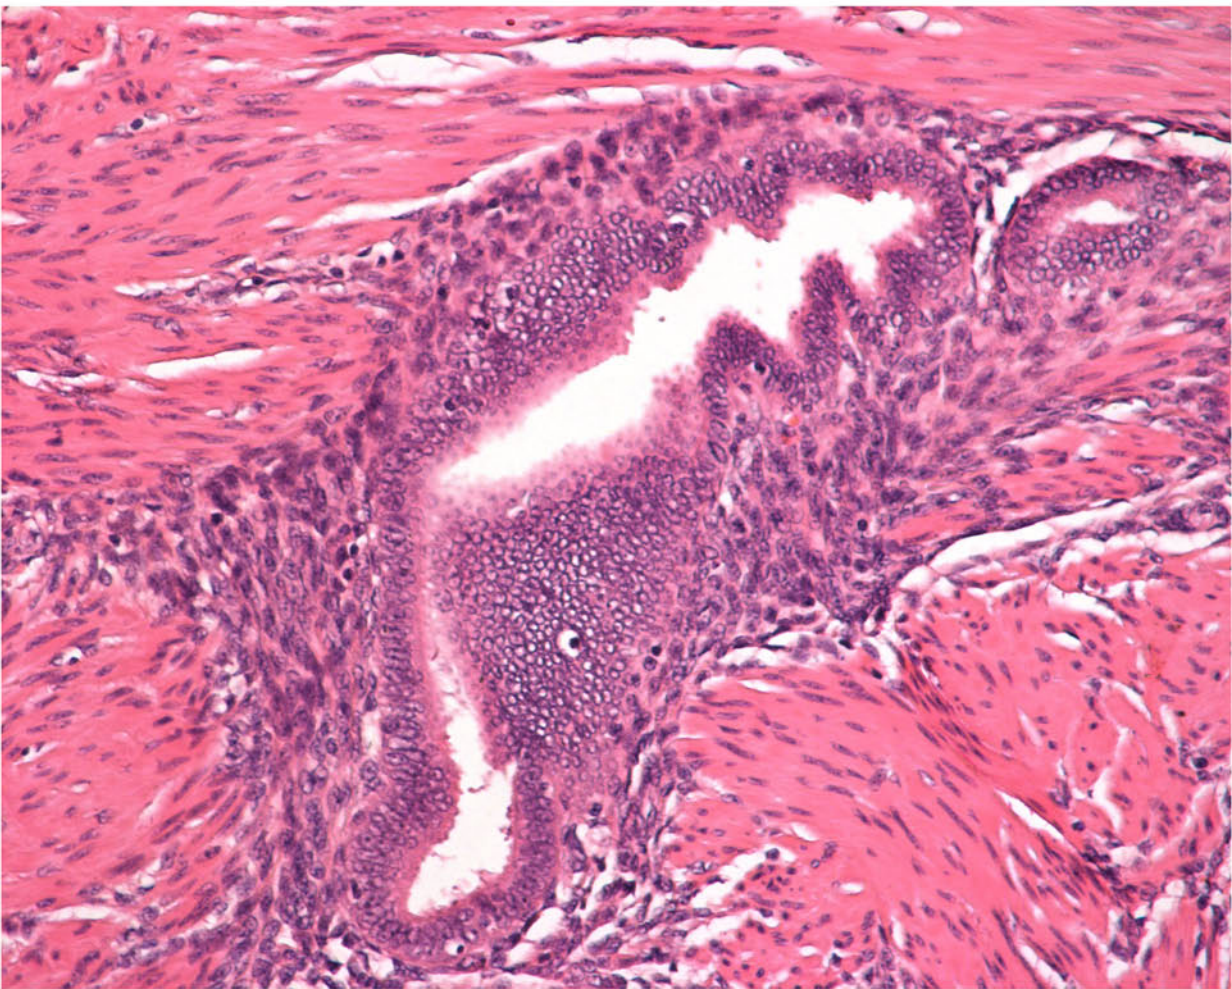

(b)

Supplement: MOESM2 [file 9648228]
